# Supplementary material
Source: PubMed Central journal article supplement (PMC6731368)
Supplement: mmc1.pdf [file mmc1.pdf]

## Supplemental Data

### Heterozygous *FOXN1* Variants Cause Low TRECs and Severe T Cell Lymphopenia, Revealing a Crucial Role of FOXN1 in Supporting Early Thymopoiesis

Marita Bosticardo, Yasuhiro Yamazaki, Jennifer Cowan, Giuliana Giardino, Cristina Corsino, Giulia Scalia, Rosaria Prencipe, Melanie Ruffner, David A. Hill, Inga Sakovich, Irma Yemialyanava, Jonathan S. Tam, Nurcicek Padem, Melissa E. Elder, John W. Sleasman, Elena Perez, Hana Niebur, Christine M. Seroogy, Svetlana Sharapova, Jennifer Gebbia, Gary Ira Kleiner, Jane Peake, Jordan K. Abbott, Erwin W. Gelfand, Elena Crestani, Catherine Biggs, Manish J. Butte, Nicholas Hartog, Anthony Hayward, Karin Chen, Jennifer Heimall, Filiz Seeborg, Lisa M. Bartnikas, Megan A. Cooper, Claudio Pignata, Avinash Bhandoola, and Luigi D. Notarangelo

# Figure S1. Proportion of subjects with cell counts below the lower limit of normal

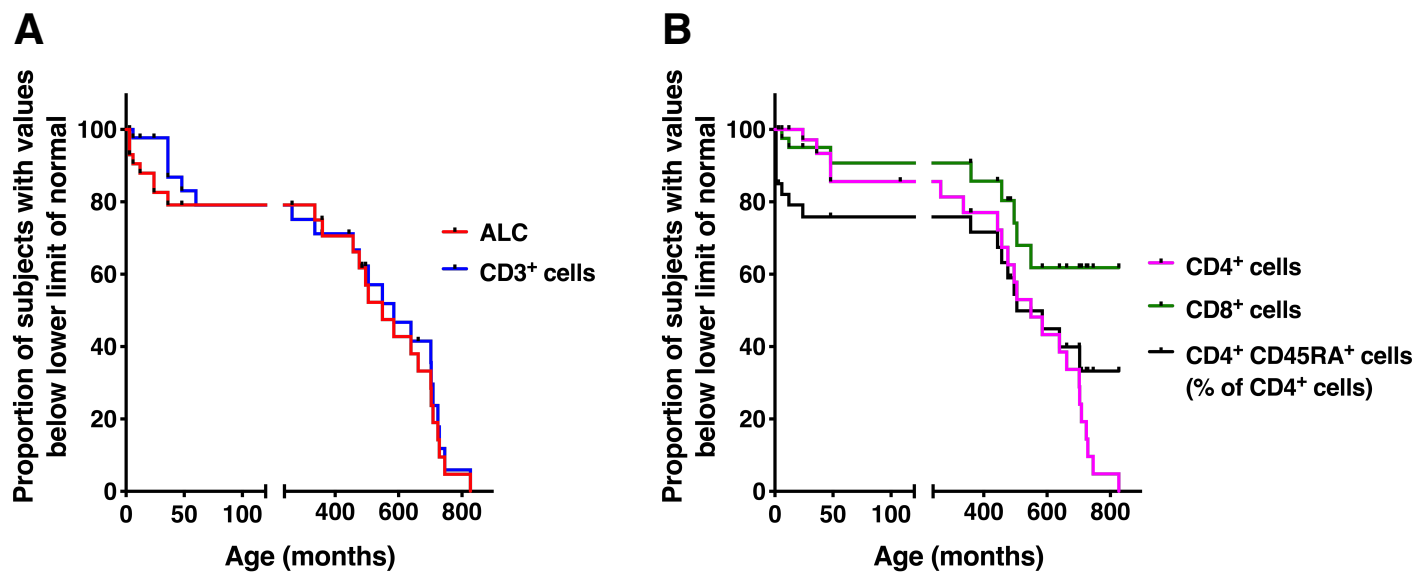

**Figure S1:** Panels A and B illustrate the proportion of subjects at various ages whose counts of total lymphocytes and CD3<sup>+</sup> cells (**A**), and CD4<sup>+</sup>, CD8<sup>+</sup> cell counts and proportion of naïve (CD45RA<sup>+</sup>) CD4<sup>+</sup> cells (**B**) were below the lower limit of normal.

**Table S1 – Immunological Data at Baseline in 21 Infants with Positive Newborn Screening for SCID and Heterozygous *FOXN1* Variants**

| Patient ID | TREC Value | ALC (cells/ $\mu$ L)<br>[nv: 3400-7600] | CD3 (cells/ $\mu$ L)<br>[nv: 2500-5500] | CD4 (cells/ $\mu$ L)<br>[nv: 1660-4000] | CD8 (cells/ $\mu$ L)<br>[nv: 560-1700] | CD19 (cells/ $\mu$ L)<br>[nv: 300-2000] | CD16/CD56 (cells/ $\mu$ L)<br>[nv: 170-1100] |
|------------|------------|-----------------------------------------|-----------------------------------------|-----------------------------------------|----------------------------------------|-----------------------------------------|----------------------------------------------|
| P1         | BSL        | 1420                                    | 271                                     | 207                                     | 54                                     | 68                                      | 124                                          |
| P2         | BSL        | 2834                                    | 992                                     | 595                                     | 368                                    | 737                                     | 935                                          |
| P3         | BSL        | 5852                                    | 1404                                    | 819                                     | 462                                    | 3804                                    | 585                                          |
| P4         | 0          | 3360                                    | 14                                      | 11                                      | 6                                      | 966                                     | 1780                                         |
| P5         | BSL        | 2390                                    | 571                                     | 853                                     | 280                                    | 217                                     | 1283                                         |
| P6         | BSL        | 2200                                    | 964                                     | 635                                     | 322                                    | 686                                     | 457                                          |
| P7         | BSL        | 1519                                    | 759                                     | 604                                     | 152                                    | 152                                     | 592                                          |
| P8         | BSL        | 3410                                    | 1091                                    | 818                                     | 273                                    | 1159                                    | 1091                                         |
| P9         | BSL        | 2210                                    | 928                                     | 782                                     | 135                                    | 824                                     | 398                                          |
| P10        | BSL        | 1620                                    | 327                                     | 194                                     | 99                                     | 341                                     | 379                                          |
| P11        | BSL        | 900                                     | 329                                     | 240                                     | 96                                     | 404                                     | 738                                          |
| P12        | 0          | 2420                                    | 73                                      | 70                                      | 0                                      | 920                                     | 992                                          |
| P13        | BSL        | 3518                                    | 538                                     | 464                                     | 81                                     | 707                                     | 1970                                         |
| P14        | 0          | na                                      | 162                                     | 132                                     | 13                                     | 735                                     | 291                                          |
| P15        | BSL        | 2400                                    | 720                                     | 570                                     | 150                                    | 930                                     | 730                                          |
| P16        | 0          | 1250                                    | 170                                     | 140                                     | 20                                     | 310                                     | 130                                          |
| P17        | 0          | 1070                                    | 110                                     | 70                                      | 0                                      | 630                                     | 170                                          |
| P18        | BSL        | 2090                                    | 374                                     | 309                                     | 54                                     | 1109                                    | 585                                          |
| P19        | 0          | 1000                                    | 11                                      | 3                                       | 4                                      | 508                                     | 364                                          |
| P20        | BSL        | 2560                                    | 1583                                    | 1078                                    | 488                                    | 913                                     | 303                                          |
| P21        | BSL        | 1193                                    | 554                                     | 355                                     | 156                                    | 266                                     | 170                                          |

Patient ID refers to Table 1. ALC, Absolute lymphocyte count; BSL, below state limit; na, not available; nv, normal values.
